# Supplementary material for: Nanocapsules Containing Neem (Azadirachta Indica) Oil: Development, Characterization, And Toxicity Evaluation
Source: PubMed Central journal article supplement (PMC5517525; doi:10.1038/s41598-017-06092-4), 2017-07-19

**NANOCAPSULES CONTAINING NEEM (*Azadirachta indica*) OIL:  
DEVELOPMENT, CHARACTERIZATION AND TOXICITY EVALUATION.**

Tatiane Pasquoto-Stigliani<sup>1,4</sup>, Estefânia V. R. Campos<sup>2</sup>, Jhones L. Oliveira<sup>2</sup>, Camila M. G. Silva<sup>3</sup>, Nathalia Bilesky-José<sup>4</sup>, Mariana Guilger<sup>1,4</sup>, Johann Troost<sup>5</sup>, Halley C. Oliveira<sup>5</sup>, Renata Stolf-Moreira<sup>5</sup>, Leonardo F. Fraceto<sup>2</sup>, Renata de Lima<sup>1,4\*</sup>

<sup>1</sup> Programa de Pós-Graduação em Biotecnologia e Monitoramento Ambiental,  
Universidade de São Carlos (UFSCar), Sorocaba, SP, Brazil

<sup>2</sup> Universidade Estadual Paulista (UNESP), Instituto de Ciência e Tecnologia,  
Departamento de Engenharia Ambiental, Sorocaba, SP, Brazil

<sup>3</sup> Departamento de Bioquímica, Universidade Estadual de Campinas (UNICAMP),  
Campinas, SP, Brazil

<sup>4</sup> Laboratório de Biotecnologia, Universidade de Sorocaba (UNISO), Sorocaba, SP,  
Brazil

<sup>5</sup> Departamento de Biologia Animal e Vegetal, Universidade Estadual de Londrina  
(UEL), Londrina, PR, Brazil

\* Corresponding author (R. Lima). Tel.: 55 (15) 2101-7000; Fax: 55 (15) 2101-7000;

E-mail: renata.lima@prof.uniso.br

**Table 1S:** Oleic Acid and neem oil quantities used for nanocapsules preparation, final quantity of oily phase, “neem oil: oleic acid” mass proportion on oily phase and final concentration of azadirachtin present on each one of the formulations according to information provided by Neem oil manufacturer.

| Formulations | Neem Oil | Oleic Acid | Oily phase | Proportion w/w | Azadirachtin |
|--------------|----------|------------|------------|----------------|--------------|
| NC_20        | 200 mg   | 0 mg       | 200 mg     | 2:0            | 27,6 µg/mL   |
| NC_15        | 150 mg   | 50 mg      | 200 mg     | 1,5:0,5        | 20,7 µg/mL   |
| NC_10        | 100 mg   | 100 mg     | 200 mg     | 1:1            | 13,8 µg/mL   |
| NC           | 0 mg     | 200 mg     | 200 mg     | 0:2            | 0 µg/mL      |

**Table 2S:** Equations used on comet assay and *Allium cepa* assay to obtain the desired parameters: Damage Index (DI) for comet assay; Mitotic Index (MI) and Alteration Index (AI) for *A. cepa* assay.

| USED EQUATIONS              |                                                              |                                                               |
|-----------------------------|--------------------------------------------------------------|---------------------------------------------------------------|
| Comet assay                 | $Score = \sum_{i=0}^4 i \times Ni$                           | $DI = \frac{score}{total\ cells\ counted}$                    |
| <i>Allium cepa</i><br>assay | $MI = \frac{Total\ dividing\ cells}{Total\ cells\ counted}$  | $MI\ rel. = \frac{IM\ of\ each\ treatment}{IM\ of\ controll}$ |
|                             | $AI = \frac{Total\ of\ alterations}{Total\ dividing\ cells}$ | $AI\ rel. = \frac{IA\ of\ each\ treatment}{IA\ of\ controll}$ |

**Figure 3S:** Initial size distributions of the nanocapsules with and without neem oil, using NTA (black lines) and DLS (red lines). A) NC; B) NC\_10; C) NC\_15; D) NC\_20. The samples were diluted 5,000 and 1,000 times for the NTA and DLS analyses, respectively.

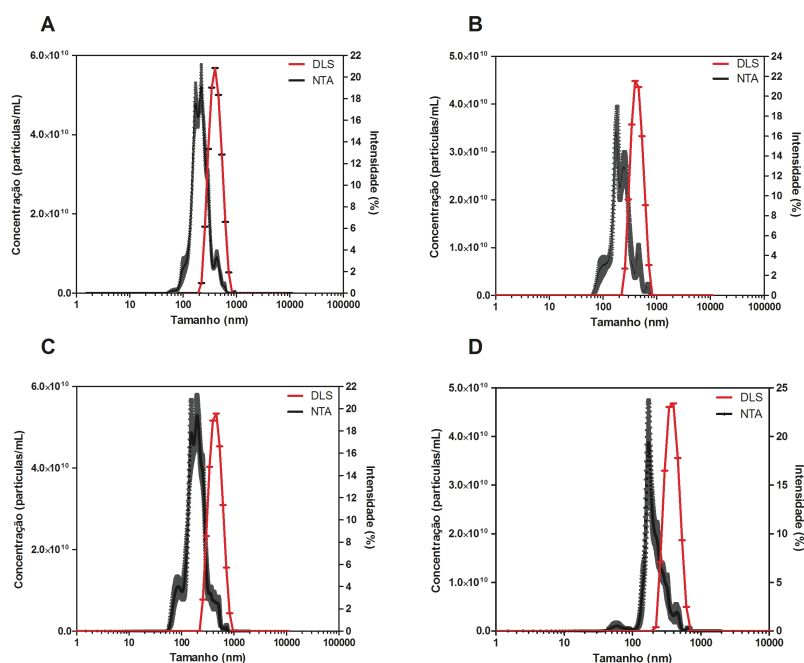

**Figure 4S:** Evaluation of cell viability using the MTT test applied to the NC formulation (without neem oil in its composition) and the 3T3, HeLa, HaCaT, and V79-4 cell lines.

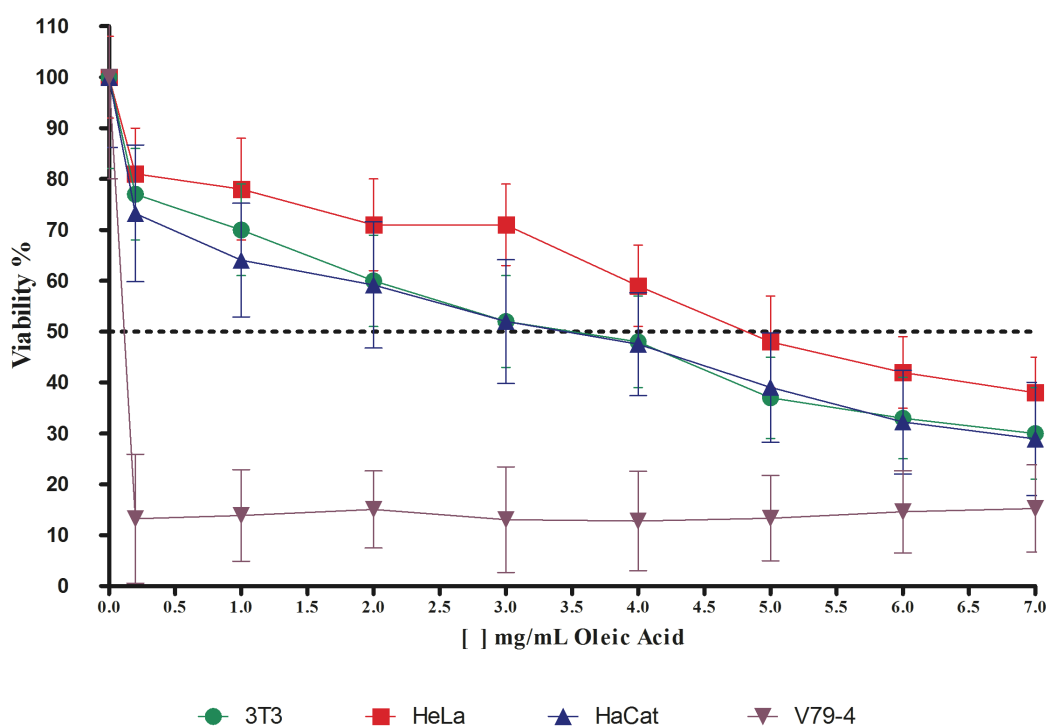

**Figure 5S:** Evaluation of cell viability using the MTT technique applied to the formulations containing neem oil and the different cell lines. A: 3T3; B: HeLa; C: HaCat; D: V79-4.

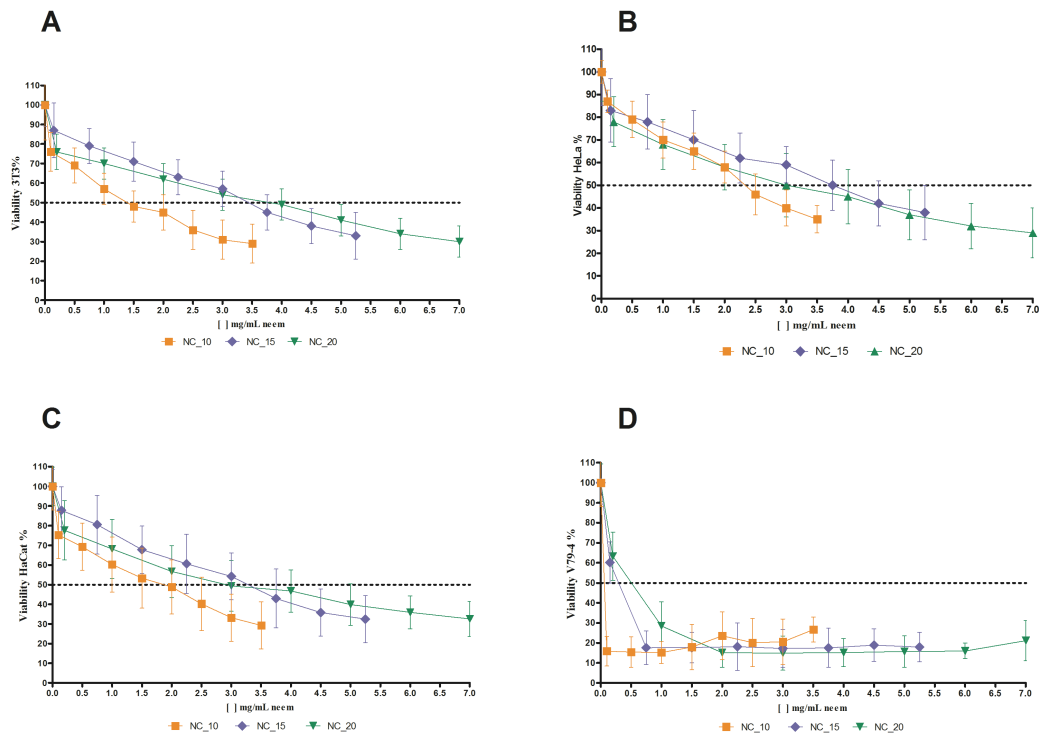

Supplement: 41598_2017_6092_MOESM1_ESM.pdf [file 41598_2017_6092_MOESM1_ESM.pdf]
